# Supplementary material for: Scaling Pharmacodynamics from Rats to Humans to Support Erythropoietin and Romiplostim Combination Therapy to Treat Erythropoietin-Resistant Anemia
Source: MDPI journal article supplement (doi:10.3390/pharmaceutics15020344), 2023-01-19
Supplement: s1 [file s1]

# **Scaling pharmacodynamics from rats to humans to support erythropoietin and romiplostim combination therapy to treat erythropoietin-resistant anemia**

Xiaoqing Fan<sup>1</sup>, Wojciech Krzyzanski<sup>2</sup>, Dongyang Liu<sup>3</sup>, Raymond S. M. Wong<sup>4</sup>,  
Xiaoyu Yan<sup>1\*</sup>

<sup>1</sup>School of Pharmacy, Faculty of Medicine, The Chinese University of Hong Kong, Shatin, Hong Kong, China SAR

<sup>2</sup>Department of Pharmaceutical Sciences, The State University of New York at Buffalo, Buffalo, NY, USA

<sup>3</sup>Drug Clinical Trial Center, Peking University Third Hospital, Beijing, China

<sup>4</sup>Division of Hematology, Department of Medicine and Therapeutics, Faculty of Medicine, The Chinese University of Hong Kong, Shatin, Hong Kong, China SAR

**\* Corresponding author:** Xiaoyu Yan, PhD

**Address:** 8th Floor, Lo Kwee-Seong Integrated Biomedical Sciences Building, Area 39, The Chinese University of Hong Kong, Shatin, N.T. Hong Kong

**Tel:** +852-34935012

**Fax:** +852-26035295

**Email address:** xiaoyuyan@cuhk.edu.hk

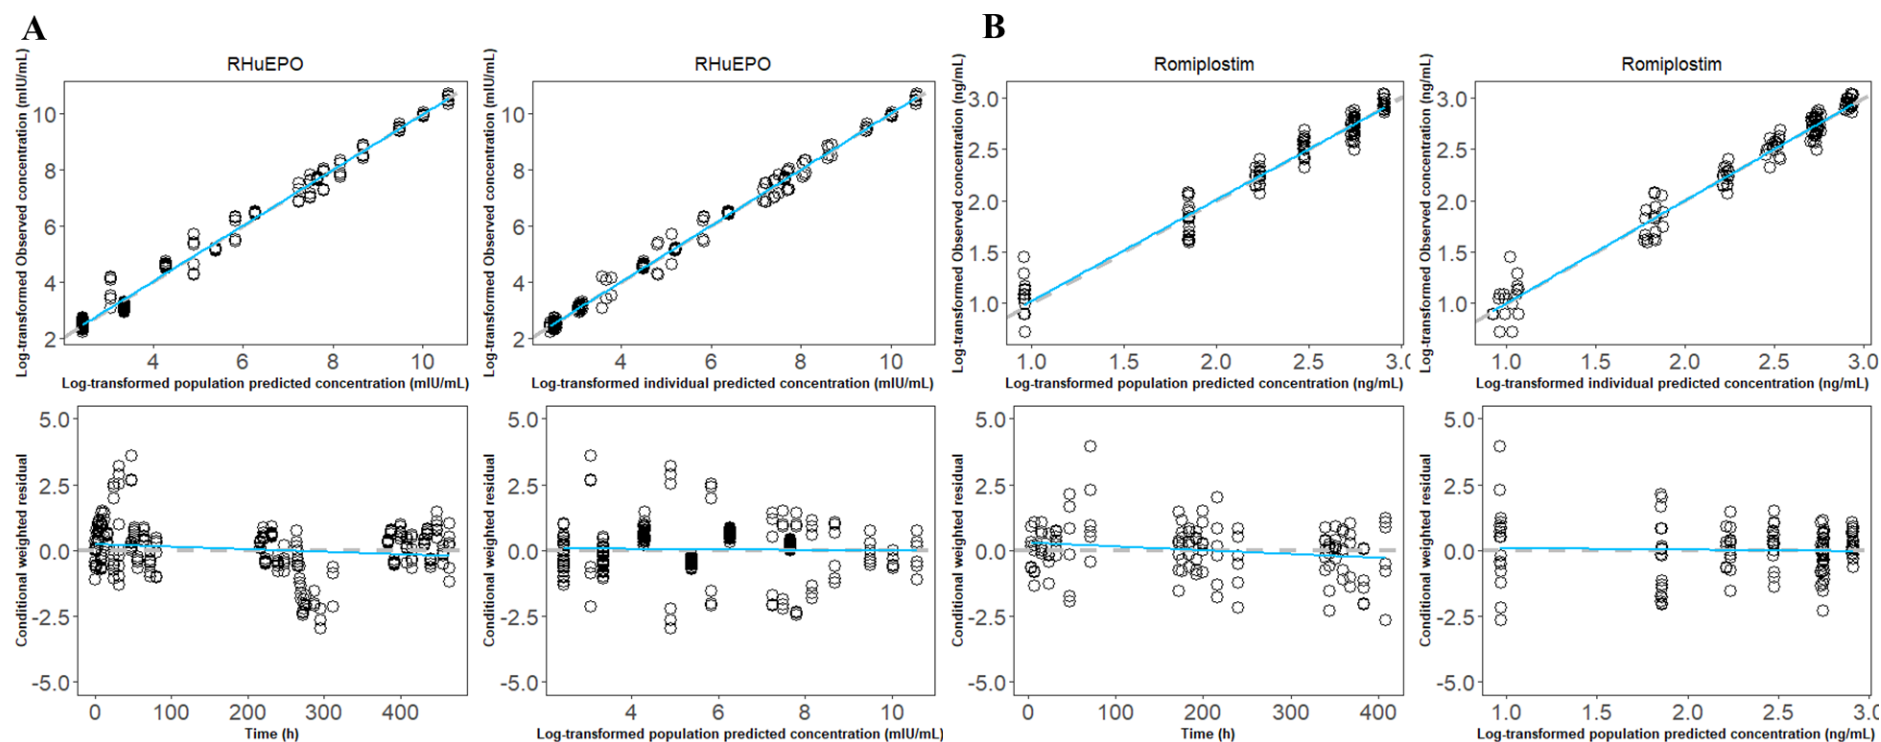

**Figure S1.** General goodness-of-fit of the final model for rHuEPO (A) and romiplostim (B). The top panels of (A) and (B) present the observed data vs. the population predictions (left) and individual predictions (right), respectively. The bottom panels of (A) and (B) present the conditional weighted residual (CWRES) vs. the time (left) and population predictions (right), respectively. The blue lines are the loess smooth lines. The gray diagonal (top panels) and horizontal (bottom panels) lines are the identity and zero lines, respectively.

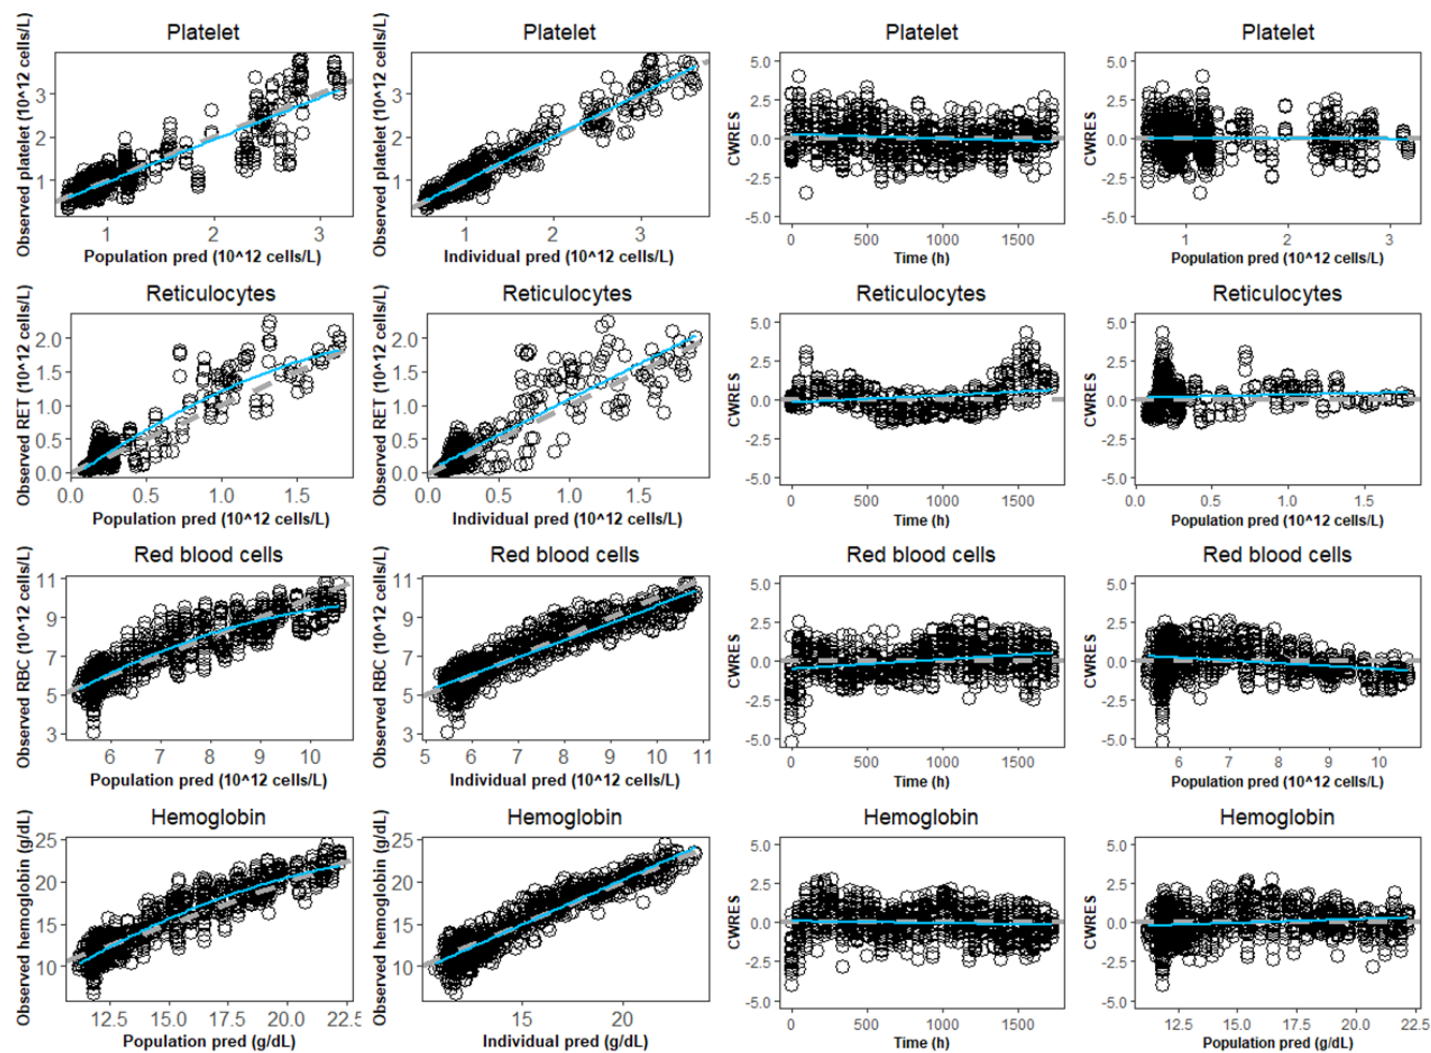

**Figure S2.** General goodness-of-fit of the final PD model, including platelets (PLT, top panels), reticulocytes (RETs, upper middle panels), RBC

counts (lower middle panels), and Hgb concentration (bottom panels). Following the left-to-right order, the panels present the observed data vs. population predictions, observed data vs. individual predictions, conditional weighted residual (CWRES) vs. time, and CWRES vs. population predictions, respectively. The blue lines are the loess smooth lines. The gray diagonal and horizontal lines are the identity and zero lines, respectively.

**Table S1.** Model estimates of the fixed- and random-effect PK parameters together with their relative standard errors. IIV = interindividual variability.

| Parameter           | Description                                                      | Unit          | Estimate | %RSE |
|---------------------|------------------------------------------------------------------|---------------|----------|------|
| CL <sub>R/F</sub>   | Clearance of romiplostim                                         | L/h/kg        | 0.0277   | 5.41 |
| V <sub>2R/F</sub>   | Volume of distribution of the central compartment of romiplostim | L/kg          | 0.515    | 22.3 |
| K <sub>CPR/F</sub>  | Intercompartment rate constant of romiplostim                    | 1/h           | 0.0136   | 79.4 |
| K <sub>PCR/F</sub>  | Intercompartment rate constant of romiplostim                    | 1/h           | 0.0493   | 16.5 |
| K <sub>a/F</sub>    | Absorption rate of romiplostim                                   | 1/h           | 0.0917   | 17.5 |
| K <sub>mR/F</sub>   | Michaelis constant of romiplostim                                | µg/L          | 10.62    | 6.06 |
| V <sub>maxR/F</sub> | Maximum elimination rate of romiplostim                          | µg/h/kg       | 0.218    | 13.2 |
| K <sub>INTR/F</sub> | Internalization rate constant of romiplostim                     | 1/h           | 0.0279   | 23.4 |
| ω <sub>CL</sub>     | IIV of CL <sub>R/F</sub>                                         | Dimensionless | 0.0553   | 26.5 |
| σ of romiplostim    | Additive error in logarithmic domain                             | Dimensionless | 0.112    | 9.49 |
| CL <sub>E</sub>     | Clearance of rHuEPO                                              | L/h/kg        | 0.0135   | 3.06 |
| V <sub>2E</sub>     | Volume of distribution of the central compartment of rHuEPO      | L/kg          | 0.0293   | 1.64 |
| K <sub>CPE</sub>    | Intercompartment rate constant of rHuEPO                         | 1/h           | 0.180    | 4.31 |
| K <sub>PCE</sub>    | Intercompartment rate constant of rHuEPO                         | 1/h           | 0.196    | 2.90 |
| K <sub>mE</sub>     | Michaelis constant of rHuEPO                                     | IU/L          | 7.932    | 2.09 |
| V <sub>maxE</sub>   | Maximum elimination rate of rHuEPO                               | IU/h/kg       | 0.289    | 2.56 |
| K <sub>INTE</sub>   | Internalization rate constant of rHuEPO                          | 1/h           | 0.00173  | 1.02 |
| ω <sub>CLE</sub>    | IIV of CL <sub>E</sub>                                           | Dimensionless | 0.0885   | 79.2 |
| ω <sub>KPCE</sub>   | IIV of K <sub>PCE</sub>                                          | Dimensionless | 0.161    | 41.2 |
| σ of rHuEPO         | Additive error in logarithmic domain                             | Dimensionless | 0.195    | 3.33 |

Note: Relative standard errors (RSE) for ω and σ are reported on the approximate standard deviation scale (standard error/variance estimate)/2. IIV is expressed as the coefficient of variation (%). σ represents variance in the residual error.

**Table S2.** Model estimates of the fixed- and random-effect PD parameters together with their relative standard errors (RSEs).

| Parameter       | Parameter explanation                                                  | Unit                     | Estimate<br>(%RSE) | IIV<br>(%RSE)  |
|-----------------|------------------------------------------------------------------------|--------------------------|--------------------|----------------|
| $T_{MP}$        | Mean lifespan of megakaryocyte cells                                   | h                        | 37.6 (5.24)        | - <sup>a</sup> |
| $T_{PLT}$       | Mean lifespan of platelets                                             | h                        | 209 (3.57)         | - <sup>a</sup> |
| $PLT_0$         | Baseline platelets in blood                                            | $\times 10^{12}$ cells/L | 1.17 (1.30)        | 0.0567 (19.9)  |
| $T_{RBC}$       | Mean residence time for mature RBCs                                    | h                        | 998 (3.29)         | - <sup>a</sup> |
| $T_{RET}$       | Mean residence time for RETs                                           | h                        | 50.2 (3.61)        | - <sup>a</sup> |
| $RBC_0$         | Baseline RBCs concentration                                            | $\times 10^{12}$ cells/L | 5.65 (0.689)       | 0.03 (34.9)    |
| KE              | First-order rate constant of MEPs differentiate into<br>BFU-E          | $\times 10^{-4}$ /h      | 6.84 (4.30)        | - <sup>a</sup> |
| KM              | First-order rate constant of MEPs differentiate into<br>MK1            | $\times 10^{-4}$ /h      | 1.18 (4.91)        | - <sup>a</sup> |
| $S_{maxRM1}$    | Maximal stimulus of romiplostim on MEPs                                | Dimensionless            | 1.67 (6.77)        | - <sup>a</sup> |
| $S_{maxRM2}$    | Maximal stimulus of romiplostim on MK-<br>committed pathway            | Dimensionless            | 27.8 (6.58)        | - <sup>a</sup> |
| $S_{maxEPO1}$   | Maximal stimulus of rHuEPO on MEPs                                     | Dimensionless            | 11.3 (7.01)        | - <sup>a</sup> |
| $SC50_{RM}$     | The concentrations of romiplostim that induce a<br>half-maximum effect | ng/mL                    | 11.9 (7.60)        | - <sup>a</sup> |
| $SC50_{EPO}$    | The concentrations of rHuEPO that induce a half-<br>maximum effect     | mIU/mL                   | 46.9 (12.7)        | - <sup>a</sup> |
| $I_{maxEPO}$    | Maximal inhibition of rHuEPO on RETs aging<br>rates                    | Dimensionless            | 0.422 (5.97)       | - <sup>a</sup> |
| $IC50_{EPO}$    | The concentration of rHuEPO that induces half-<br>maximum inhibition   | mIU/mL                   | 5.59 (9.54)        | - <sup>a</sup> |
| MCH             | Mean corpuscular hemoglobin                                            | pg/cell                  | 21.0 (2.77)        | - <sup>a</sup> |
| $GAM_1$         | Hill factor on physiological limit                                     | Dimensionless            | 1.2 (5.33)         | - <sup>a</sup> |
| $GAM_2$         | Hill factor on $SC50_{RM}$                                             | Dimensionless            | 94.2 (6.25)        | - <sup>a</sup> |
| $\sigma_{PLT}$  | Proportional error of platelets                                        | Dimensionless            | 0.138 (2.58)       | - <sup>b</sup> |
| $\sigma_{RBC}$  | Proportional error of RBC                                              | Dimensionless            | 0.0843 (2.63)      | - <sup>b</sup> |
| $\sigma_{HGB}$  | Additive error of HGB                                                  | Dimensionless            | 1.23 (2.44)        | - <sup>b</sup> |
| $\sigma_{RET2}$ | Proportional error of RET                                              | Dimensionless            | 0.575 (4.32)       | - <sup>b</sup> |

|     |                          |               |       |                |
|-----|--------------------------|---------------|-------|----------------|
| OBJ | Objective function value | Dimensionless | -1845 | - <sup>b</sup> |
|-----|--------------------------|---------------|-------|----------------|

Note: The PK parameters are fixed at their estimated values. The RSEs for  $\omega$  and  $\sigma$  are reported on the approximate standard deviation scale (standard error/variance estimate)/2. Interindividual variability (IIV) is expressed as the coefficient of variation (%).  $\sigma$  represents the variance in the residual error. -<sup>a</sup>, did not apply due to no improvement in the goodness of fit. -<sup>b</sup>, not applicable.

**PD model equations:**

For RBC production, the PD model comprises a series of compartments, including MEPs, BFU-E, CFU-E, normoblasts (NORs), and RETs that eventually develop into RBCs, to mimic erythropoiesis. The stimulatory effect of romiplostim targets the production rate of MEPs, and the differentiation of MEPs into BFU-E cells is controlled by processes with the first-order rate constant  $KE$ , which can be stimulated by rHuEPO, as follows (Eq. 14):

$$\begin{aligned} \frac{dMEP}{dt} = & Kin1 \cdot \left(1 + \frac{Smax_{RM1} \cdot C_{ROM}}{SC50_{RM} + C_{ROM}}\right) - KE \cdot \left(1 + \frac{Smax_{EPO} \cdot C_{EPO}}{SC50_{EPO} + C_{EPO}}\right) \\ & \cdot MEP \cdot \left(1 - \frac{\Delta HGB}{RH}\right)^{GAM} - KM \cdot MEP \end{aligned} \quad (14),$$

where  $Kin1$  is a zero-order rate constant for producing MEPs.  $C_{ROM}$  and  $C_{EPO}$  are the serum concentrations of romiplostim and rHuEPO at time  $t$ , respectively;  $S_{ROM1}$  and  $S_{maxEPO}$  are the maximal stimuli of romiplostim and rHuEPO, respectively; and  $SC50_{RM}$  and  $SC50_{EPO}$  are the concentrations of romiplostim and rHuEPO that induce a half-maximum effect, respectively. MEPs differentiate into erythroid and MK lineages according to the first-order rate constants  $KE$  and  $KM$ , respectively.  $\left(1 - \frac{\Delta HGB}{RH}\right)^{GAM}$  represent the physiological limit, a homeostatic mechanism to maintain normal body function.  $\Delta HGB = HGB - HGB0$ , where  $HGB0$  represents the baseline HGB concentration.  $GAM$  is a power coefficient.  $RH$  is the physiological limit of HGB. The highest  $RH$  for HGB was fixed at 24 based on a previous multiple-dose rHuEPO (1350 IU/kg) PK/PD study in rats. The overall production rate of HGB then became zero, preventing the response from increasing further.



$$\frac{dBFUE}{dt} = KE \cdot \left(1 + \frac{Smax_{EPO} \cdot C_{EPO}}{SC50_{EPO} + C_{EPO}}\right) \cdot MEP \cdot \left(1 - \frac{\Delta HGB}{RH}\right)^{GAM} \quad (15)$$

$$- \frac{1}{T_{EP1}} \cdot BFUE$$

$$\frac{dCFUE}{dt} = 2^{MCFU} \cdot \frac{1}{T_{EP1}} \cdot BFUE - \frac{1}{T_{EP2}} \cdot CFUE \quad (16)$$

$$\frac{dNOR}{dt} = 2^{MNOR} \cdot \frac{1}{T_{EP2}} \cdot CFUE - \frac{1}{T_{EP3}} \cdot NOR \quad (17)$$

$$\frac{dRET}{dt} = \frac{1}{T_{EP3}} \cdot NOR - \frac{1}{T_{RET}} \cdot RET \cdot \left(1 - \frac{Imax_{EPO} \cdot C_{EPO}}{IC50_{EPO} + C_{EPO}}\right) \quad (18)$$

$$\frac{dMRBC}{dt} = \frac{1}{T_{RET}} \cdot RET \cdot \left(1 - \frac{Imax_{EPO} \cdot C_{EPO}}{IC50_{EPO} + C_{EPO}}\right) - \frac{1}{T_{RBC}} \cdot MRBC \quad (19),$$

where  $2^{MCFU}$  and  $2^{MNOR}$  are factors reflecting the number of CFU-E cells that can be produced by one BFU-E and the number of NORs that can be produced by one CFU-E cell, respectively.  $T_{EP}$  represents the average time required for precursors to develop into the next cell population.  $T_{RET}$  and  $T_{RBC}$  represent the mean residence times for RETs and mature RBCs, respectively.  $T_{EP}$  was assumed to be equal to  $T_{RET}$  to reduce the number of model parameters. rHuEPO can stimulate the early release of immature RETs from BM into peripheral blood; thus, a part of rHuEPO's effect on the distribution of RET maturation times must be attributed to the release of stress RETs. Hence, in our model, the effect of rHuEPO on the age distribution of RETs was written as  $\left(1 - \frac{Imax_{EPO} \cdot C_{EPO}}{IC50_{EPO} + C_{EPO}}\right)$ , which is consistent with the mechanism of action and greatly improves the model fit.  $Imax_{EPO}$  is the maximal inhibition of rHuEPO on RETs aging rates, and  $IC50_{EPO}$  is the serum concentration of rHuEPO that induces half-maximum inhibition.

HGB concentrations were derived from the mass of RBCs, which consists of mature RBCs (MRBC) and RETs:

$$RBC = MRBC + RET \quad (20)$$

$$HGB = MCH \cdot RBC / 10 \quad (21)$$

where MCH is the mean corpuscular HGB, which was estimated directly from the data. The denominator 10 converts the MCH unit to pg/cell.

For platelet production, MK1 was assumed to be generated at  $K_{in2}$  in addition to the MEP differentiation pathway; the effect of romiplostim is incorporated as a stimulus on the production of both MEPs and MK1. The MK-committed progenitor pathway stimulated by romiplostim was included in the Model:

$$\frac{dMK1}{dt} = K_{in2} \cdot \left(1 + \frac{S_{max_{RM2}} \cdot C_{ROM}}{SC50_{RM} + C_{ROM}}\right) + KM \cdot MEP - \frac{n}{T_{MP}} \cdot MK1 \quad (22)$$

$S_{ROM2}$  is the maximal stimulus of romiplostim on  $K_{in2}$ . A series of aging compartments (MK<sub>n</sub>,  $n = 10$ ) denoted the MK precursor cells in BM, with the first-order transition rates  $n/TMP$ . The model equations are as follows:

$$\frac{dMK_i}{dt} = \frac{n}{T_{MP}} \cdot (MK_{i-1} - MK_i) \quad i = 2, \dots, n \quad (23)$$

$$\frac{dPLT_1}{dt} = CF \cdot \frac{n}{T_{MP}} \cdot MK_n - \frac{n}{T_{PLT}} \cdot PLT_1 \quad (24)$$

Similarly, PLT<sub>n</sub> ( $n = 10$ ) represents the platelets in blood with the transition rate  $nPLT/TPLT$ :

$$\frac{dPLT_i}{dt} = \frac{n}{T_{PLT}} \cdot (PLT_{i-1} - PLT_i) \quad i = 2, \dots, n \quad (25),$$

where  $T_{MP}$  and  $T_{PLP}$  denote the mean lifespans of precursor cells and platelets, respectively. CF represents the conversion factor equal to the average number of platelets produced by an MK and was fixed at 4000. The platelets were modeled as the sum of platelet counts in each PLT compartment:

$$PLT = PLT_1 + \dots + PLT_n \quad (26)$$

The secondary parameters and baseline equations defined by the steady-state value can be used to reduce the number of model parameters as follows:

$$RET_0 = MRBC \cdot T_{RET} / T_{RBC} \quad (27)$$

$$NOR_0 = RET_0 \cdot T_{EP3} / T_{RET} \quad (28)$$

$$CFUE_0 = RET_0 \cdot T_{EP2} / (T_{RET} \cdot 2^{MNOR}) \quad (29)$$

$$BFUE_0 = RET_0 \cdot T_{EP2} / (T_{RET} \cdot 2^{MNOR} \cdot 2^{MCFU}) \quad (30)$$

$$MEP_0 = BFUE_0 / (T_{EP1} \cdot KE) \quad (31)$$

$$MKn = T_{MP} \cdot PLT_0 / (CF \cdot T_{PLT} \cdot 10) \quad (32)$$

$$K_{in1} = MEP_0 \cdot (KM + KE) \quad (33)$$

$$K_{in2} = \frac{PLT_0}{CF \cdot T_{PLT}} - MEP_0 \cdot KM \quad (34)$$

The interindividual variabilities (IIVs) of fixed-effect parameters were described by the exponential error model:

$$P_i = \theta_i \cdot \exp(\eta_{P_i}) \quad (35),$$

where  $P_i$  is the  $i$ th parameter for the individual,  $\theta_i$  is the typical value (estimated population geometric mean) for  $P_i$ , and  $\eta_{P_i}$  is an independent random variable that is normally distributed with zero mean and variance ( $\omega^2$ ). Random effects were added on  $PLT_0$  and  $RBC_0$ , while for other values of  $\theta_i$ , variances of random effect parameters were fixed to a small value (0.0225, i.e., 15% coefficient of variation [cv]) to improve the expectation–maximization (EM) algorithm efficiency in NONMEM.

The residual variabilities in RBC, PLT, RET, and HGB were added separately. Different residual error models were explored, including an additive error model, a proportional error model, and a combined error (proportional plus additive) model. Eventually, a combined model of residual error was applied and described as:

$$Y_{ij} = \hat{Y}_{ij} \cdot (1 + \varepsilon_1) + \varepsilon_2 \quad (36)$$

where  $Y_{ij}$  is the observation of individual  $i$  at time  $t_j$ ,  $\hat{Y}_{ij}$  is the corresponding model prediction, and  $\varepsilon_1$  and  $\varepsilon_2$  are assumed to be independent and normally distributed random variables, respectively, with a zero mean and standard deviation ( $\sigma$ ).
